# Supplementary material
Source: MDPI journal article supplement (https://www.mdpi.com/2073-4344/13/3/595)
Supplement: s1 [file s1]

## Supplementary data

**Table S1.** Average atomic concentration of components in the sputtered catalysts (at. %).

| Sample              | C    | N   | O    | Al  | Si  | Cr   | Fe   | Ni   | Cu   |
|---------------------|------|-----|------|-----|-----|------|------|------|------|
| Mesh                | 8.7  | 2.8 | 4.5  | 0.2 | 0.9 | 16.5 | 59.9 | 6.5  | 0.0  |
| Cu <sub>s</sub>     | 7.8  | 1.4 | 34.5 | 0.2 | 0.3 | 6.0  | 20.1 | 1.9  | 27.9 |
| NiCu14 <sub>s</sub> | 8.7  | 2.2 | 39.3 | 0.2 | 0.2 | 4.5  | 14.1 | 5.7  | 25.3 |
| NiCu11 <sub>s</sub> | 9.3  | 1.9 | 33.6 | 0.2 | 0.2 | 6.1  | 20.4 | 14.9 | 13.4 |
| NiCu41 <sub>s</sub> | 8.3  | 1.6 | 35.7 | 0.1 | 0.2 | 6.0  | 20.2 | 21.2 | 6.6  |
| Ni <sub>s</sub>     | 13.4 | 1.3 | 26.3 | 0.2 | 0.5 | 9.5  | 34.2 | 14.5 | 0.2  |

**Table S2.** Kinetic energy of the main Auger lines observed for granular and sputtered catalysts.

| Sample | Cu <sub>g</sub> | NiCu14 <sub>g</sub> | NiCu11 <sub>g</sub> | NiCu41 <sub>g</sub> | Ni <sub>g</sub> |
|--------|-----------------|---------------------|---------------------|---------------------|-----------------|
| NiLMM  | -               | 844.29              | 844.22              | 844.27              | 844.31          |
| CuLMMb | 838.72          | 838.64              | 838.64              | 838.64              | -               |
| CuLMMa | 918.26          | 918.2               | 918.21              | 918.15              | -               |
|        | Cu <sub>s</sub> | NiCu14 <sub>s</sub> | NiCu11 <sub>s</sub> | NiCu41 <sub>s</sub> | Ni <sub>s</sub> |
| NiLMM  | -               | 844.32              | 844.12              | 844.12              | 844.12          |
| CuLMMb | 838.2           | 838.68              | 838.64              | 838.64              | -               |
| CuLMMa | 917.85          | 918.29              | 918.15              | 918.15              | -               |

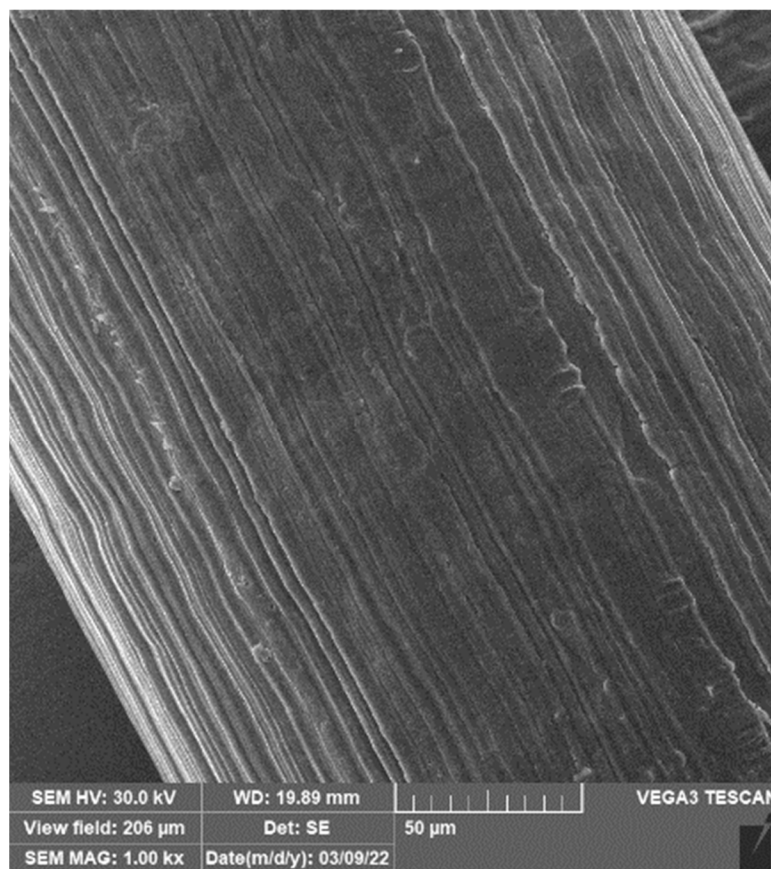

**Figure S1.** SEM image of the bare stainless steel mesh.

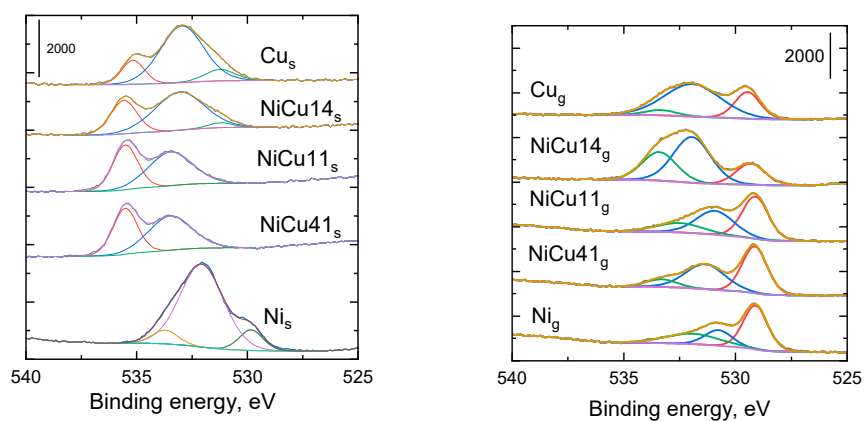

**Figure S2.** O1s deconvolution of sputtered (left) and granular (right) catalysts.

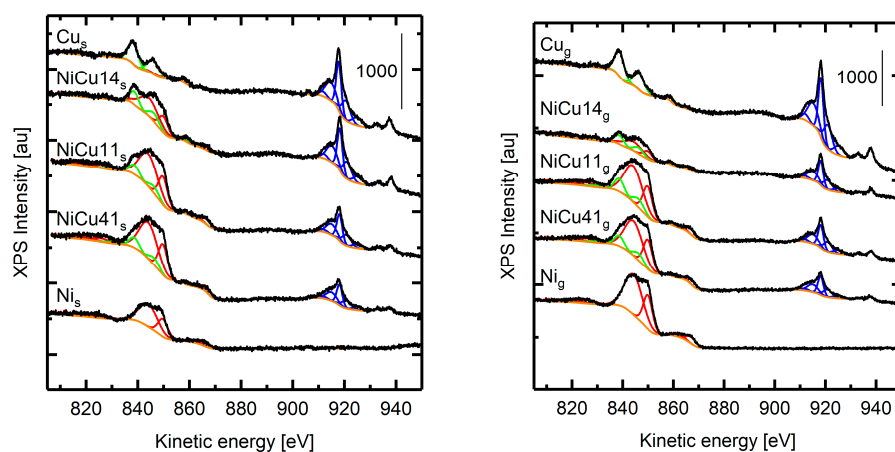

**Figure S3.** Deconvoluted XPS spectra corresponding to Auger lines Cu LMMa (blue), Cu LMMb (green) and Ni LMM (red) of sputtered (left) and granular (right) catalysts.
